# Supplementary material for: Parametric numerical study and optimization of mass transfer and bubble size distribution in a gas-liquid stirred tank bioreactor equipped with Rushton turbine using computational fluid dynamics
Source: publisher site journal article supplement (doi:10.1515/ijcre-2021-0083), 2021-07-19
Supplement: Supplementary file 1 [file j_ijcre-2021-0083_suppl_002.docx]

**Table S1**. The geometrical parameters of the bioreactors designed using GAMBIT software.

| **Parameter**  **Design No.** | **Number of blades** | **T (cm)** | **H (cm)** | **Di (cm)** | **W (cm)** | **h (cm)** | **C (cm)** |
| --- | --- | --- | --- | --- | --- | --- | --- |
| 1 | 4 | 20 | 20 | 6.60 | 1.66 | 1.32 | 6.66 |
| 2 | 6 | 20 | 20 | 6.60 | 1.66 | 1.32 | 8.88 |
| 3 | 4 | 20 | 20 | 6.60 | 1.66 | 1.32 | 8.88 |
| 4 | 6 | 20 | 20 | 6.60 | 1.66 | 1.32 | 6.66 |
